# Supplementary material
Source: publisher figshare collection journal article supplement (https://tandf.figshare.com/ndownloader/files/22212696)
Supplement: Supplementary file 1 [file 22212696]

**Supplementary Material**

**Table S1. Systematic literature review search terms and strategy**

| **Search terms for PubMed** |
| --- |
| #1 (“Air Pollution” [Mesh] OR “Air Pollutions” [Title/Abstract] OR “Air Pollutant” [Title/Abstract] OR “Pollution, Air” [Title/Abstract] OR “Air quality” [Title/Abstract] OR “O3” [Title/Abstract] OR “Ozone” [Title/Abstract] OR “SO2” [Title/Abstract] OR “Sulfur Dioxide” [Title/Abstract] OR “NO2” [Title/Abstract] OR “Nitrogen Dioxide” [Title/Abstract] OR “Particulate matter” [Title/Abstract] OR “PAHs” [Title/Abstract] OR “Polycyclic Aromatic Hydrocarbons” [Title/Abstract] OR “UFP” [Title/Abstract] OR “Ultra Fine Particle” [Title/Abstract] OR “PM” [Title/Abstract] OR “PM2.5” [Title/Abstract] OR “PM10” [Title/Abstract] OR “Airborne Particulate Matter” [Title/Abstract] OR “Particulate Matter, Airborne” [Title/Abstract] OR “Air Pollutants, Particulate” [Title/Abstract] OR “Particulate Air Pollutants” [Title/Abstract] OR “Pollutants, Particulate Air” [Title/Abstract] OR “Ambient Particulate Matter” [Title/Abstract] OR “Particulate Matter, Ambient” [Title/Abstract] OR “Fine Particle” [Title/Abstract]) |
| #2 (“Attention Deficit Hyperactivity Disorder” [Mesh] OR “ADHD” [Title/Abstract] OR “Attention Deficit Disorders with Hyperactivity” [Title/Abstract] OR “Attention Deficit Hyperactivity Disorders” [Title/Abstract] OR “Attention Deficit-Hyperactivity Disorder” [Title/Abstract] OR “Attention Deficit-Hyperactivity Disorders” [Title/Abstract] OR “Deficit-Hyperactivity Disorder, Attention” [Title/Abstract] OR “Deficit-Hyperactivity Disorders, Attention” [Title/Abstract] OR “Disorder, Attention Deficit-Hyperactivity” [Title/Abstract] OR “Disorders, Attention Deficit-Hyperactivity” [Title/Abstract] OR “Hyperkinetic Syndrome” [Title/Abstract] OR “Syndromes, Hyperkinetic” [Title/Abstract] OR “ADDH” [Title/Abstract] OR “Attention Deficit Hyperactivity Disorder” [Title/Abstract] OR “Attention Deficit Disorder” [Title/Abstract] OR “Attention Deficit Disorders” [Title/Abstract] OR “Deficit Disorder, Attention” [Title/Abstract] OR “ Deficit Disorders, Attention” [Title/Abstract] OR “Disorder, Attention Deficit” [Title/Abstract] OR “Disorders, Attention Deficit” [Title/Abstract] OR “Brain Dysfunction, Minimal” [Title/Abstract] OR “Dysfunction, Minimal Brain” [Title/Abstract] OR “Minimal Brain Dysfunction” [Title/Abstract] OR “Hyperactivity Disorders” [Title/Abstract]) |
| #3 (“Cohort Study” [Mesh] OR “Cohort” [Title/Abstract] OR “Prospective” [Title/Abstract] OR “Longitudinal” [Title/Abstract] OR “Case-control Study” [Mesh] OR “Case-control Studies” [Title/Abstract] OR “Case control Study” [Title/Abstract] OR “Case control Studies” [Title/Abstract]) |
| #1 AND #2 AND #3 |
| **Search terms for Web of Science** |
| #1 (“Air Pollution” Or “Air Pollutions” Or “Air Pollutant” Or “Pollution, Air” Or “Air quality” Or “O3” [Title/Abstract] Or “Ozone” Or “SO2” Or “Sulfur Dioxide” Or “NO2” Or “Nitrogen Dioxide” Or “Particulate matter” Or “PAHs” Or “Polycyclic Aromatic Hydrocarbons” Or “UFP” Or “Ultra Fine Particle” Or “PM” Or “PM2.5” Or “PM10” Or “Airborne Particulate Matter” Or “Particulate Matter, Airborne” Or “Air Pollutants, Particulate” Or “Particulate Air Pollutants” Or “Pollutants, Particulate Air” Or “Ambient Particulate Matter” Or “Particulate Matter, Ambient” Or “Fine Particle”) |
| #2 (“Attention Deficit Hyperactivity Disorder” Or “ADHD” Or “Attention Deficit Disorders with Hyperactivity” Or “Attention Deficit Hyperactivity Disorders” Or “Attention Deficit-Hyperactivity Disorder” Or “Attention Deficit-Hyperactivity Disorders” Or “Deficit-Hyperactivity Disorder, Attention” Or “Deficit-Hyperactivity Disorders, Attention” Or “Disorder, Attention Deficit-Hyperactivity” Or “Disorders, Attention Deficit-Hyperactivity” Or “Hyperkinetic Syndrome” Or “Syndromes, Hyperkinetic” Or “ADDH” Or “Attention Deficit Hyperactivity Disorder” Or “Attention Deficit Disorder” Or “Attention Deficit Disorders” Or “Deficit Disorder, Attention” Or “ Deficit Disorders, Attention” Or “Disorder, Attention Deficit” Or “Disorders, Attention Deficit” Or “Brain Dysfunction, Minimal” Or “Dysfunction, Minimal Brain” Or “Minimal Brain Dysfunction” OR “Hyperactivity Disorders”) |
| #3 (“Cohort Study” Or “Cohort” Or “Prospective” Or “Longitudinal” Or “Case-control Study” Or “Case-control Studies” Or “Case control Study” Or “Case control Studies”) |
| #1 AND #2 AND #3 |
| **Search terms for Cochrane Library** |
| #1 (“Air Pollution” [Title Abstract Keyword] OR “Air Pollutions” [Title Abstract Keyword] OR “Air Pollutant” [Title Abstract Keyword] OR “Pollution, Air” [Title Abstract Keyword] OR “Air quality” [Title Abstract Keyword] OR “O3” [Title Abstract Keyword] OR “Ozone” [Title Abstract Keyword] OR “SO2” [Title Abstract Keyword] OR “Sulfur Dioxide” [Title Abstract Keyword] OR “NO2” [Title Abstract Keyword] OR “Nitrogen Dioxide” [Title Abstract Keyword] OR “Particulate matter” [Title Abstract Keyword] OR “PAHs” [Title Abstract Keyword] OR “Polycyclic Aromatic Hydrocarbons” [Title Abstract Keyword] OR “UFP” [Title Abstract Keyword] OR “Ultra Fine Particle” [Title Abstract Keyword] OR “PM” [Title Abstract Keyword] OR “PM2.5” [Title Abstract Keyword] OR “PM10” [Title Abstract Keyword] OR “Airborne Particulate Matter” [Title Abstract Keyword] OR “Particulate Matter, Airborne” [Title Abstract Keyword] OR “Air Pollutants, Particulate” [Title Abstract Keyword] OR “Particulate Air Pollutants” [Title Abstract Keyword] OR “Pollutants, Particulate Air” [Title Abstract Keyword] OR “Ambient Particulate Matter” [Title Abstract Keyword] OR “Particulate Matter, Ambient” [Title Abstract Keyword] OR “Fine Particle” [Title Abstract Keyword]) |
| #2 (“Attention Deficit Hyperactivity Disorder” [Title Abstract Keyword] OR “ADHD” [Title Abstract Keyword] OR “Attention Deficit Disorders with Hyperactivity” [Title Abstract Keyword] OR “Attention Deficit Hyperactivity Disorders” [Title Abstract Keyword] OR “Attention Deficit-Hyperactivity Disorder” [Title Abstract Keyword] OR “Attention Deficit-Hyperactivity Disorders” [Title Abstract Keyword] OR “Deficit-Hyperactivity Disorder, Attention” [Title Abstract Keyword] OR “Deficit-Hyperactivity Disorders, Attention” [Title Abstract Keyword] OR “Disorder, Attention Deficit-Hyperactivity” [Title Abstract Keyword] OR “Disorders, Attention Deficit-Hyperactivity” [Title Abstract Keyword] OR “Hyperkinetic Syndrome” [Title Abstract Keyword] OR “Syndromes, Hyperkinetic” [Title Abstract Keyword] OR “ADDH” [Title Abstract Keyword] OR “Attention Deficit Hyperactivity Disorder” [Title Abstract Keyword] OR “Attention Deficit Disorder” [Title Abstract Keyword] OR “Attention Deficit Disorders” [Title Abstract Keyword] OR “Deficit Disorder, Attention” [Title Abstract Keyword] OR “ Deficit Disorders, Attention” [Title Abstract Keyword] OR “Disorder, Attention Deficit” [Title Abstract Keyword] OR “Disorders, Attention Deficit” [Title Abstract Keyword] OR “Brain Dysfunction, Minimal” [Title Abstract Keyword] OR “Dysfunction, Minimal Brain” [Title Abstract Keyword] OR “Minimal Brain Dysfunction” [Title Abstract Keyword] OR “Hyperactivity Disorders” [Title Abstract Keyword]) |
| #3 (“Cohort Study” [Title Abstract Keyword] OR “Cohort” [Title Abstract Keyword] OR “Prospective” [Title Abstract Keyword] OR “Longitudinal” [Title Abstract Keyword] OR “Case-control Study” [Title Abstract Keyword] OR “Case-control Studies” [Title Abstract Keyword] OR “Case control Study” [Title Abstract Keyword] OR “Case control Studies” [Title Abstract Keyword]) |
| #1 AND #2 AND #3 |

**Table S2. Quality assessment of included cohort studies**

| Author  (Publication Year) | Newcastle-Ottawa Scale | | | | | | | | | |
| --- | --- | --- | --- | --- | --- | --- | --- | --- | --- | --- |
| Selection | | | | Comparability | | Outcome | | | Total |
| 1a | 2b | 3c | 4d | 5e | 6f | 7g | 8h | 9i |
| Morales E et al. (2009) | 1 | 1 | 1 | 1 | 0 | 1 | 1 | 1 | 0 | 7 |
| Gong T et al. (2014) | 1 | 1 | 1 | 1 | 0 | 1 | 0 | 0 | 0 | 5 |
| Perera FP et al. (2014) | 1 | 1 | 1 | 1 | 0 | 1 | 1 | 1 | 0 | 7 |
| Mortamais M et al. (2017) | 1 | 1 | 1 | 1 | 0 | 1 | 1 | 1 | 1 | 8 |
| Forns J et al. (2018) | 1 | 1 | 1 | 1 | 0 | 1 | 1 | 1 | 0 | 7 |
| Markevych I et al. (2018) | 1 | 1 | 1 | 1 | 0 | 1 | 1 | 1 | 0 | 7 |
| Roberts S et al. (2019) | 1 | 1 | 1 | 1 | 0 | 1 | 1 | 1 | 0 | 7 |

a Representativeness of the exposed cohort.

b Selection of the non-exposed cohort.

c Ascertainment of exposure.

d Demonstration that outcome of interest was not present at start of study.

e Comparability of cohorts on the basis of the design or analysis (adjusted for age).

f Comparability of cohorts on the basis of the design or analysis (adjusted for any other factor).

g Assessment of outcome.

h Was follow-up long enough for outcomes to occur.

I Adequacy of follow-up of cohorts.

**Table S3. Quality assessment of included case-control studies**

| Author  (Publication Year) | Newcastle-Ottawa Scale | | | | | | | | | |
| --- | --- | --- | --- | --- | --- | --- | --- | --- | --- | --- |
| Selection | | | | Comparability | | Outcome | | | Total |
| 1a | 2b | 3c | 4d | 5e | 6f | 7g | 8h | 9i |
| Siddique S et al. (2011) | 1 | 1 | 1 | 1 | 0 | 1 | 1 | 1 | 0 | 7 |
| Abid Z et al. (2014) | 1 | 1 | 1 | 1 | 0 | 1 | 0 | 1 | 0 | 6 |

a Sufficient case definition.

b Representativeness of the case group.

c Selection of the control group.

d Definition of the control group.

e Comparability of the case and control groups on the basis of the design or analysis (adjusted for age).

f Comparability of the case and control groups on the basis of the design or analysis (adjusted for any other factor).

g Ascertainment of exposure.

h Were the case and control exposures determined using the same methods.

I Non response rate.


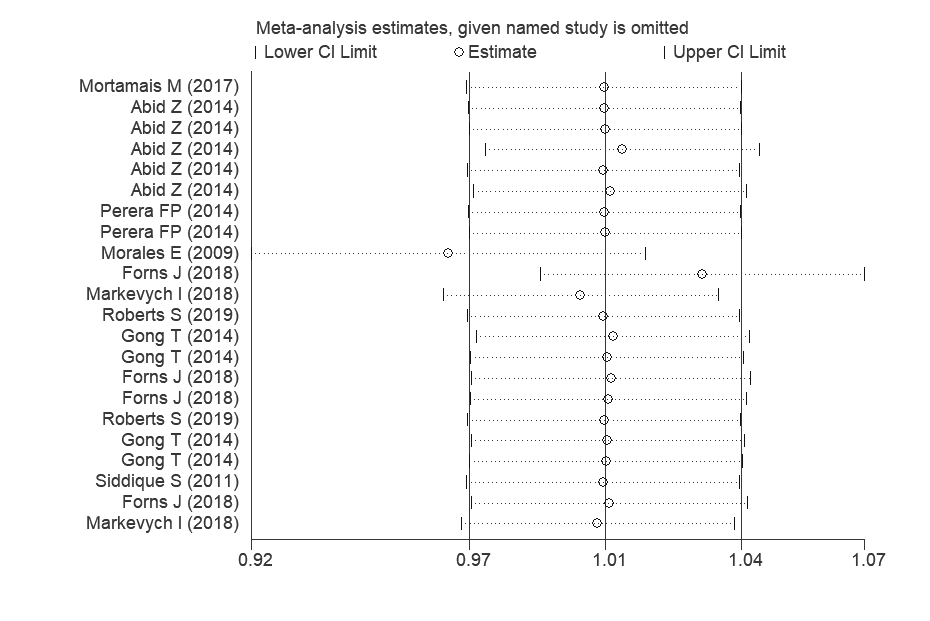


**Figure S1**. Sensitive analysis of air pollutants and attention deficit hyperactivity disorder.

**
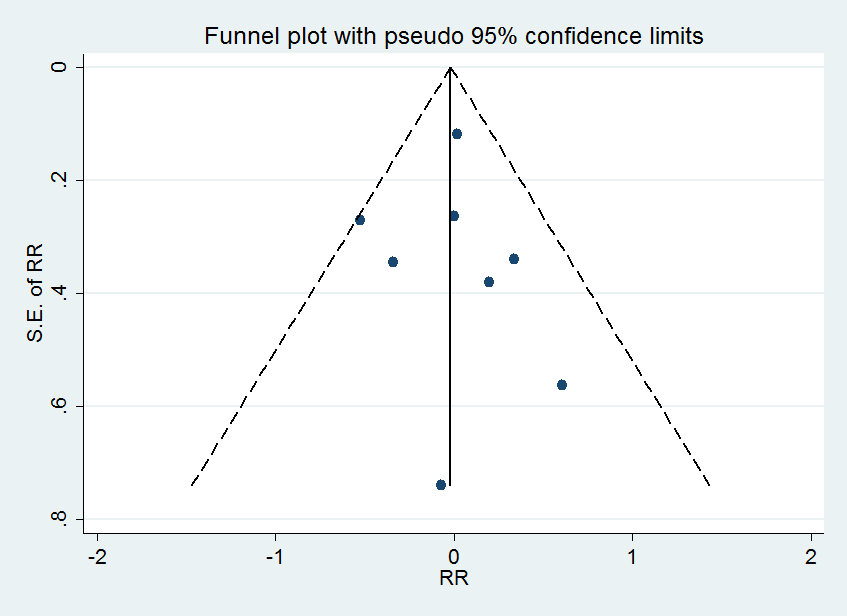
**

**Figure S2**. Funnel plot for publication bias of polycyclic aromatic hydrocarbons and attention deficit hyperactivity disorder.


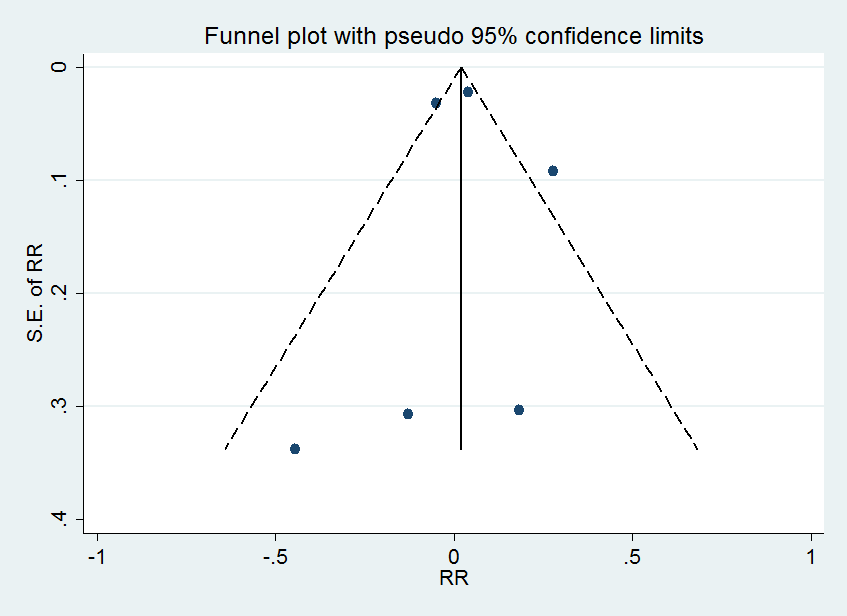


**Figure S3**. Funnel plot for publication bias of nitrogen oxides and attention deficit hyperactivity disorder.


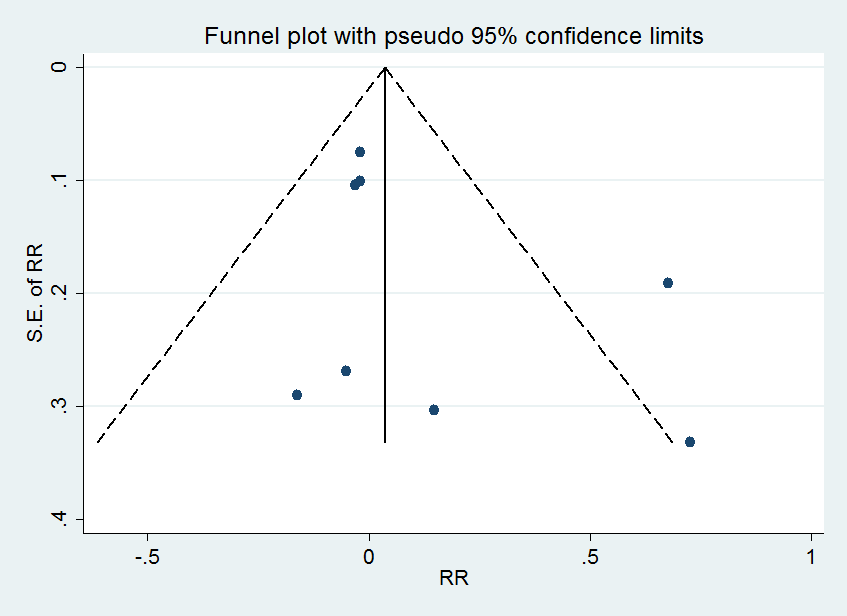


**Figure S4**. Funnel plot for publication bias of particulate matters and attention deficit hyperactivity disorder.
